# Supplementary material for: Regression for accurate and sensitive grading of mutations diagnostic of antibiotic resistance in Mycobacterium tuberculosis
Source: medRxiv preprint, doi:10.1101/2024.07.01.24309598, version 1 (2024-07-05)
Supplement: Supplementary Figure 5 [file 309598_file14.pdf]

[illegible]

pncA\_p.Asp12His    pncA\_p.Ile6Ser    pncA\_p.Leu156Pro    pncA\_p.Thr160Arg    pncA\_p.Thr47Asn    pncA\_p.Tyr103Ser

pncA\_p.Asp12His    pncA\_p.Ile6Ser    pncA\_p.Leu156Pro    pncA\_p.Thr160Arg    pncA\_p.Thr47Asn    pncA\_p.Tyr103Ser

[illegible]

|       |   |   |   |   |   |   |   |   |   |   |   |   |
|-------|---|---|---|---|---|---|---|---|---|---|---|---|
| 2.2.1 | 3 | 3 | 1 | 7 | 1 | 7 | 0 | 1 | 1 | 6 | 5 | 9 |
|-------|---|---|---|---|---|---|---|---|---|---|---|---|

|         |   |   |   |   |   |   |   |   |   |   |   |   |
|---------|---|---|---|---|---|---|---|---|---|---|---|---|
| 2.2.1.2 | 0 | 0 | 1 | 0 | 0 | 0 | 0 | 0 | 0 | 0 | 0 | 0 |
| 2.2.2   | 0 | 2 | 0 | 0 | 0 | 0 | 0 | 1 | 0 | 0 | 0 | 0 |

[illegible][illegible]

|         |   |   |   |   |   |   |   |   |   |   |   |   |
|---------|---|---|---|---|---|---|---|---|---|---|---|---|
| 4.3.2.1 | 0 | 2 | 0 | 0 | 0 | 0 | 0 | 0 | 0 | 0 | 0 | 0 |
| 4.3.2   | 0 | 0 | 1 | 1 | 0 | 1 | 1 | 0 | 0 | 1 | 2 | 4 |

|         |   |   |   |   |   |   |   |   |   |   |   |   |
|---------|---|---|---|---|---|---|---|---|---|---|---|---|
| 4.4.1.1 | 0 | 0 | 0 | 0 | 1 | 0 | 0 | 0 | 0 | 0 | 0 | 0 |
|---------|---|---|---|---|---|---|---|---|---|---|---|---|

|     |   |   |   |   |   |   |   |   |   |   |   |
|-----|---|---|---|---|---|---|---|---|---|---|---|
| 4.8 | 0 | 0 | 0 | 0 | 0 | 0 | 0 | 2 | 0 | 0 | 1 |
|-----|---|---|---|---|---|---|---|---|---|---|---|

[illegible]

|         |   |   |   |   |   |   |   |   |     |    |   |    |    |    |   |    |   |   |   |   |
|---------|---|---|---|---|---|---|---|---|-----|----|---|----|----|----|---|----|---|---|---|---|
| 1.2.2   | 0 | 0 | 0 | 0 | 0 | 0 | 0 | 0 | 0   | 0  | 0 | 0  | 0  | 0  | 1 | 49 | 2 | 9 | 0 |   |
| 2.2.1   | 0 | 3 | 0 | 1 | 6 | 4 | 9 | 8 | 154 | 82 | 4 | 73 | 19 | 17 | 5 | 30 | 1 | 8 | 2 | 6 |
| 3.2.1.1 | 1 | 5 | 0 | 0 | 0 | 0 | 0 | 0 | 0   | 0  | 0 | 1  | 0  | 0  | 1 | 0  | 0 | 1 | 0 |   |

[illegible][illegible][illegible][illegible]

|         |    |    |   |   |   |   |   |    |    |   |   |   |   |   |   |    |   |    |    |   |   |
|---------|----|----|---|---|---|---|---|----|----|---|---|---|---|---|---|----|---|----|----|---|---|
| 4.3.3   | 11 | 43 | 0 | 0 | 0 | 0 | 0 | 50 | 24 | 0 | 0 | 0 | 0 | 0 | 0 | 0  | 0 | 6  | 43 | 0 | 2 |
| 4.3.4.1 | 0  | 0  | 0 | 0 | 0 | 0 | 0 | 0  | 0  | 0 | 0 | 0 | 0 | 0 | 0 | 2  | 4 | 14 | 0  | 0 |   |
| 4.3.4.2 | 0  | 0  | 0 | 0 | 1 | 0 | 0 | 0  | 0  | 0 | 0 | 0 | 0 | 0 | 3 | 36 | 0 | 0  | 3  | 0 |   |

[illegible][illegible][illegible][illegible]

|       |   |   |   |   |   |   |   |   |   |   |   |   |   |   |   |   |   |   |   |   |
|-------|---|---|---|---|---|---|---|---|---|---|---|---|---|---|---|---|---|---|---|---|
| 1.2.1 | 0 | 0 | 0 | 0 | 0 | 0 | 0 | 0 | 1 | 0 | 1 | 0 | 0 | 0 | 0 | 0 | 0 | 2 | 0 | 0 |
| 1.2.2 | 0 | 0 | 0 | 0 | 0 | 0 | 0 | 0 | 0 | 0 | 0 | 0 | 0 | 1 | 1 | 1 | 0 | 2 | 0 | 0 |

|         |   |   |   |   |   |   |   |   |   |   |   |   |   |   |   |    |   |   |   |   |
|---------|---|---|---|---|---|---|---|---|---|---|---|---|---|---|---|----|---|---|---|---|
| 2.2.1.1 | 0 | 0 | 0 | 0 | 0 | 0 | 0 | 0 | 0 | 0 | 0 | 0 | 0 | 0 | 0 | 12 | 0 | 0 | 0 | 0 |
| 2.2.1.2 | 0 | 0 | 0 | 0 | 0 | 0 | 0 | 0 | 0 | 0 | 0 | 0 | 0 | 0 | 0 | 1  | 0 | 1 | 0 | 0 |

|       |   |   |   |   |   |   |   |   |   |   |   |   |   |   |   |   |   |   |   |   |   |
|-------|---|---|---|---|---|---|---|---|---|---|---|---|---|---|---|---|---|---|---|---|---|
| 3.1.1 | 0 | 0 | 0 | 0 | 0 | 0 | 0 | 0 | 0 | 0 | 0 | 0 | 0 | 0 | 0 | 0 | 2 | 0 | 1 | 0 | 0 |
| 3.1.2 | 0 | 0 | 0 | 0 | 0 | 0 | 0 | 1 | 0 | 0 | 0 | 0 | 0 | 0 | 0 | 0 | 1 | 0 | 0 | 0 | 0 |

|       |   |   |   |   |   |   |   |    |   |   |   |   |   |   |   |   |   |   |   |   |
|-------|---|---|---|---|---|---|---|----|---|---|---|---|---|---|---|---|---|---|---|---|
| 4.1   | 0 | 0 | 0 | 0 | 0 | 0 | 4 | 19 | 0 | 0 | 0 | 0 | 0 | 0 | 1 | 0 | 0 | 0 | 0 | 0 |
| 4.1.1 | 0 | 0 | 0 | 0 | 0 | 0 | 0 | 0  | 0 | 0 | 0 | 0 | 0 | 0 | 3 | 4 | 0 | 1 | 0 | 0 |

|         |   |   |   |   |   |   |   |   |   |   |   |   |   |   |    |    |   |    |   |   |
|---------|---|---|---|---|---|---|---|---|---|---|---|---|---|---|----|----|---|----|---|---|
| 4.1.2   | 0 | 0 | 0 | 0 | 0 | 0 | 0 | 2 | 0 | 0 | 0 | 0 | 0 | 0 | 0  | 2  | 0 | 0  | 0 | 0 |
| 4.1.2.1 | 2 | 2 | 0 | 0 | 0 | 0 | 4 | 2 | 1 | 6 | 0 | 0 | 0 | 0 | 14 | 63 | 8 | 18 | 0 | 0 |
| 4.2.1   | 0 | 0 | 0 | 0 | 0 | 0 | 0 | 1 | 0 | 0 | 0 | 0 | 0 | 0 | 0  | 33 | 0 | 0  | 0 | 0 |

|         |   |   |   |   |    |    |   |   |   |   |   |   |   |   |   |    |   |   |   |   |
|---------|---|---|---|---|----|----|---|---|---|---|---|---|---|---|---|----|---|---|---|---|
| 4.3.4.1 | 0 | 0 | 0 | 0 | 0  | 0  | 0 | 0 | 0 | 0 | 0 | 0 | 0 | 0 | 1 | 5  | 0 | 1 | 0 | 0 |
| 4.3.4.2 | 0 | 0 | 0 | 0 | 35 | 33 | 0 | 0 | 1 | 0 | 0 | 0 | 0 | 3 | 6 | 20 | 1 | 0 | 0 | 2 |

|         |   |   |   |   |   |   |   |   |   |   |   |   |   |   |   |   |   |   |   |   |   |
|---------|---|---|---|---|---|---|---|---|---|---|---|---|---|---|---|---|---|---|---|---|---|
| 4.4.1.1 | 0 | 0 | 0 | 0 | 0 | 0 | 0 | 0 | 0 | 0 | 0 | 0 | 0 | 0 | 0 | 2 | 2 | 0 | 0 | 0 | 0 |
| 4.4.1.2 | 0 | 0 | 0 | 0 | 0 | 0 | 0 | 0 | 0 | 0 | 0 | 0 | 0 | 0 | 0 | 0 | 1 | 0 | 0 | 0 | 0 |

[illegible]

|     |   |   |   |   |   |   |   |   |   |   |   |   |   |   |    |    |   |   |   |   |   |
|-----|---|---|---|---|---|---|---|---|---|---|---|---|---|---|----|----|---|---|---|---|---|
| 4,7 | 0 | 0 | 0 | 0 | 0 | 0 | 0 | 0 | 0 | 0 | 0 | 0 | 0 | 0 | 1  | 0  | 2 | 0 | 0 | 0 | 0 |
| 4,8 | 0 | 4 | 0 | 0 | 0 | 0 | 0 | 4 | 0 | 0 | 0 | 0 | 0 | 0 | 13 | 82 | 0 | 5 | 0 | 0 |   |

[illegible]
