# Supplementary material for: Regression for accurate and sensitive grading of mutations diagnostic of antibiotic resistance in Mycobacterium tuberculosis
Source: bioRxiv or medRxiv preprint supplement (doi:10.1101/2024.07.01.24309598), 2024-07-05

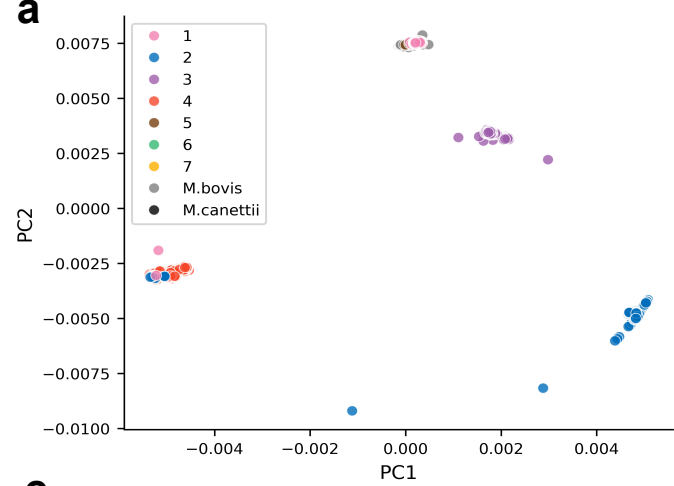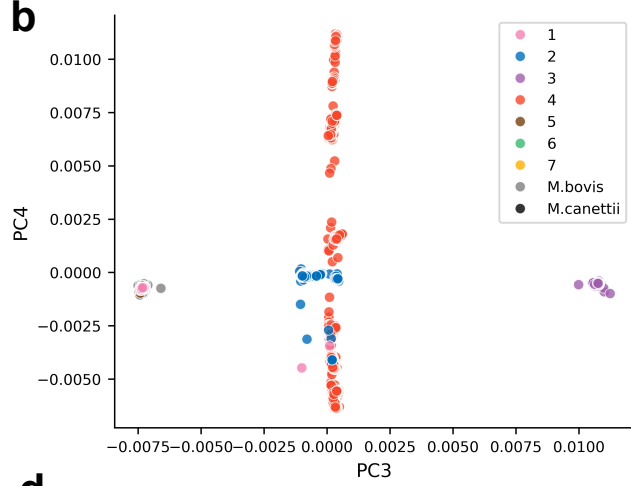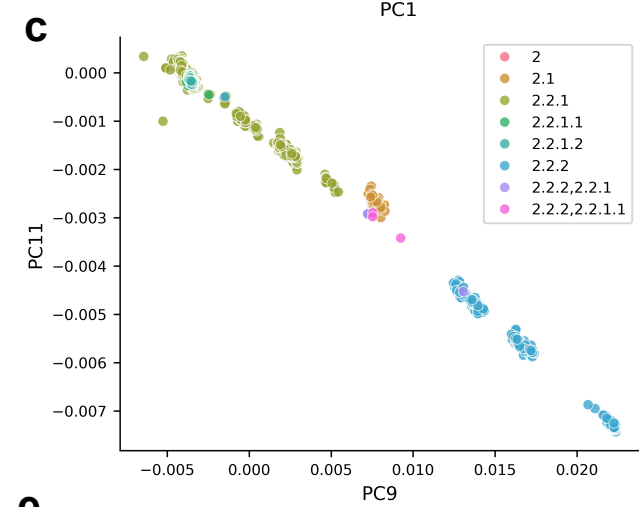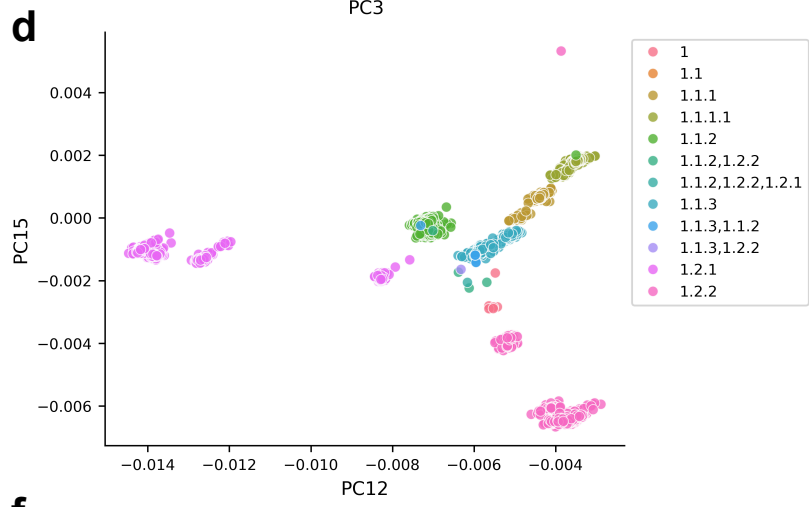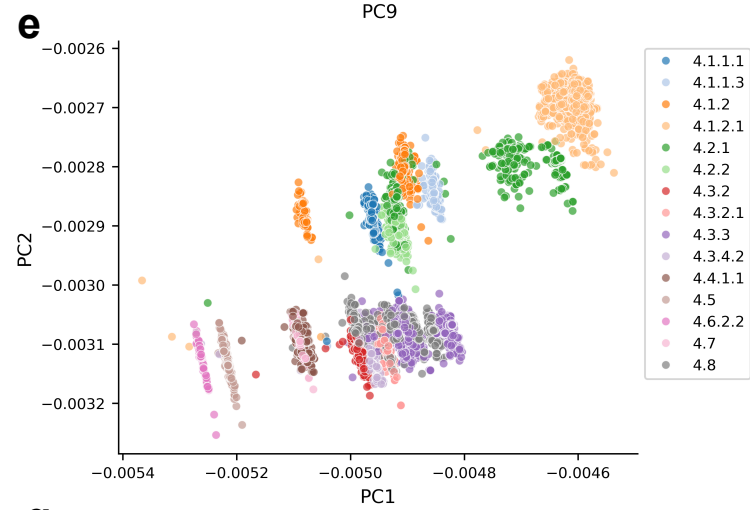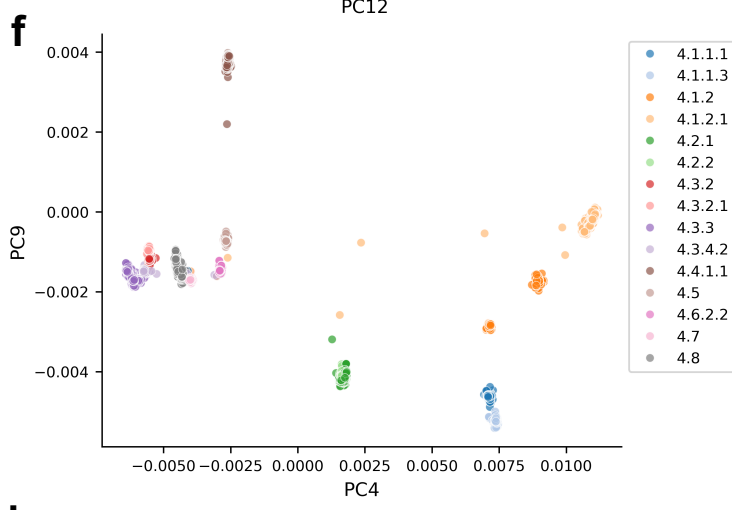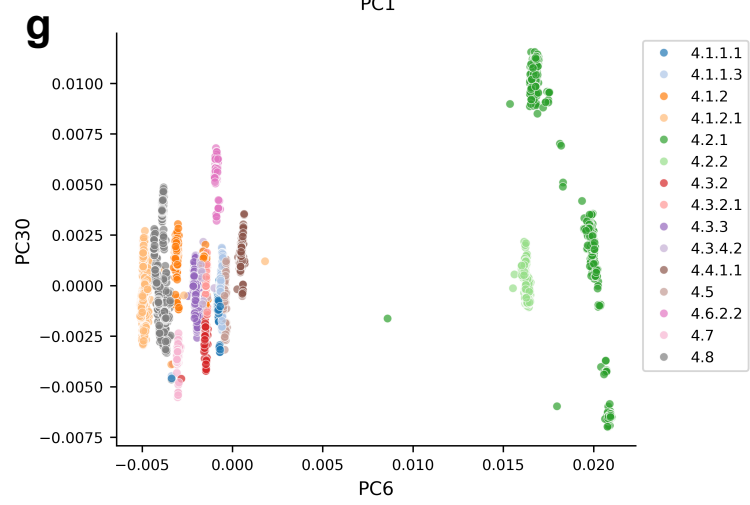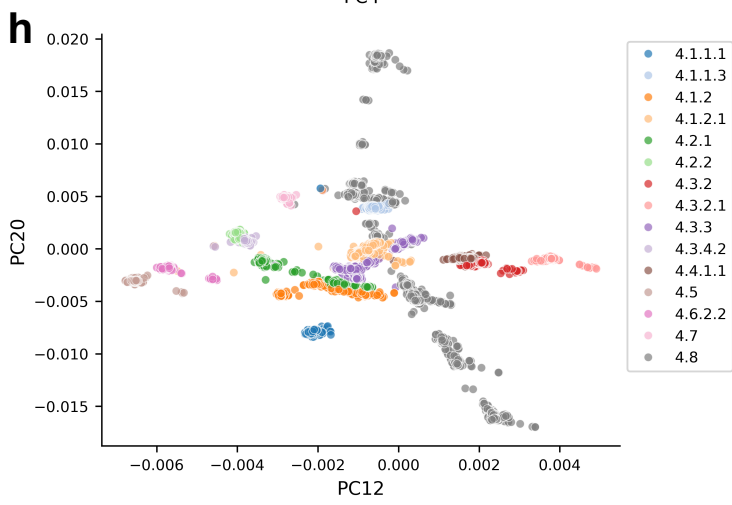

Supplement: Supplementary file [file media-4.pdf]
